1

2 **Genome-scale modeling specifies the metabolic capabilities of *Rhizophagus***  
3 ***irregularis***

4 Philipp Wendering<sup>1</sup>, Zoran Nikoloski<sup>1,2\*</sup>

5 <sup>1</sup>Bioinformatics, Institute of Biochemistry and Biology, University of Potsdam, 14476 Potsdam,  
6 Germany

7 <sup>2</sup>Systems Biology and Mathematical Modeling, Max Planck Institute of Molecular Plant Physiology,  
8 14476 Potsdam, Germany

9 \*corresponding author

10 **Email:** nikoloski@mpimp-golm.mpg.de

11 **Author Contributions:** Philipp Wendering: Designed and performed research, wrote the paper;  
12 Zoran Nikoloski: Designed research, wrote the paper

13 **Competing Interest Statement:** no competing interest

14 **This PDF file includes:**

15 Main Text  
16 Figures 1 to 4  
17

18 **Abstract**

19 *Rhizophagus irregularis* is one of the most extensively studied arbuscular mycorrhizal fungi (AMF)  
20 that forms symbioses with and improves the performance of many crops. Lack of transformation  
21 protocol for *R. irregularis* renders it challenging to investigate molecular mechanisms that shape  
22 the physiology and interactions of this AMF with plants. Here we used all published genomics,  
23 transcriptomics, and metabolomics resources to gain insights in the metabolic functionalities of *R.*  
24 *irregularis* by reconstructing its high-quality genome-scale metabolic network that considers  
25 enzyme constraints. Extensive validation tests with the enzyme-constrained metabolic model  
26 demonstrated that it can be used to: (1) accurately predict increased growth of *R. irregularis* on  
27 myristate with minimal medium; (2) integrate enzyme abundances and carbon source  
28 concentrations that yield growth predictions with high and significant Spearman correlation ( $\rho_s =$   
29 0.74) to measured hyphal dry weight; and (3) simulated growth rate increases with tighter  
30 association of this AMF with the host plant across three fungal structures. Based on the validated  
31 model and system-level analyses that integrate data from transcriptomics studies, we predicted  
32 that differences in flux distributions between intraradical mycelium and arbuscles are linked to  
33 changes in amino acid and cofactor biosynthesis. Therefore, our results demonstrated that the  
34 enzyme-constrained metabolic model can be employed to pinpoint mechanisms driving  
35 developmental and physiological responses of *R. irregularis* to different environmental cues. In  
36 conclusion, this model can serve as a template for other AMF and paves the way to identify  
37 metabolic engineering strategies to modulate fungal metabolic traits that directly affect plant  
38 performance.

39

## 40 **Importance**

41 Mounting evidence points at the benefits of the symbiotic interactions between the arbuscular  
42 mycorrhiza fungus *Rhizophagus irregularis* and crops; yet, the molecular mechanisms underlying  
43 the physiological responses of this fungus to different host plants and environments remain largely  
44 unknown. We present a manually curated, enzyme-constrained genome-scale metabolic model of  
45 *R. irregularis* that can accurately predict experimentally observed phenotypes. We show that this  
46 high-quality model provides an entry point into better understanding the metabolic and physiological  
47 responses of this fungus to changing environments due to the availability of different nutrients. The  
48 model can be used to design metabolic engineering strategies to tailor *R. irregularis* metabolism  
49 towards improving the performance of host plants.

## 50 **Main Text**

### 51 **Introduction**

52  
53 More than two thirds of all land plants are involved in symbiotic relationships with arbuscular  
54 mycorrhizal fungi (AMF) (1). AMF are members of a monophyletic group within the early diverging  
55 fungi. Arbuscular mycorrhizal symbiosis is established by fungal hyphae entering cortical root cells  
56 of the host plant to form subcellular structures, termed arbuscles (ARB), where nutrients are  
57 exchanged between the symbiotic partners (2, 3). *Rhizophagus irregularis* (previously wrongly  
58 ascribed to *Glomus intraradices* (4)) is one of the most extensively studied AMF, shown to form  
59 symbioses with a variety of agriculturally relevant plants. Soil inoculation with *R. irregularis* leads  
60 to improved overall plant growth (5–8), fruit quality (9, 10), and yield (11–14). Further, *R. irregularis*  
61 confers robustness against multiple abiotic stress conditions (15–22). These qualities thus make it  
62 a valuable contributor to plant fitness, which is widely exploited for plant cultivation.

63  
64  
65 Spores of *R. irregularis* grow into a network of coenocytic hyphae, which can be separated into  
66 three major structures: the extraradical mycelium (ERM), the intraradical mycelium (IRM), and ARB  
67 (2). The ERM is comprised of hyphae located in soil, whereas hyphae of the two apoplastic  
68 structures, IRM and ARB, grow between or penetrate cortical root cells. *R. irregularis* mainly  
69 provides inorganic phosphate (Pi) and nitrogen (N) to the host plant as its extensive hyphae  
70 network bridges the nutrient depletion zone surrounding the roots (23–27); in return, it receives  
71 carbohydrates and lipids from the host plant (28–35). Pi is one of the key nutrients that limits plant  
72 growth, and under Pi-limiting conditions, most plants rely on additional Pi supplied by a fungal  
73 symbiotic partner (3). To this end, the external hyphae of the fungus either take up Pi directly from  
74 the soil or obtain it from hydrolysis of complex organic phosphates, such as phytate (36). According  
75 to the current evidence in *R. irregularis*, assimilated Pi is polymerized into polyphosphate (PolyP),  
76 which is translocated through the ERM towards IRM (27). Finally, Pi is released from arbuscles into

77 the periarbuscular space. Several Pi transporters have been identified in *R. irregularis* which could  
78 be involved in Pi translocation from fungus to plant (26, 37, 38).

79 Moreover, N is another key nutrient for plant growth, comprising up to 5% of their dry weight.  
80 However, the availability of N sources to the plant is restricted due to the limited range of roots and  
81 its inhomogeneous distribution in soil. Hence, many plants depend on interactions with microbes  
82 which can provide additional nitrogen assimilated from the surrounding soil (39). *R. irregularis* takes  
83 up N in the form of ammonia (NH<sub>4</sub><sup>+</sup>) and nitrate (NO<sub>3</sub><sup>-</sup>) as well as amino acids and small peptides  
84 via designated transporters. Three NH<sub>4</sub><sup>+</sup> transporters, GintAMT1-3, and a NO<sub>3</sub><sup>-</sup> transporter, GiNT,  
85 have been identified in *R. irregularis* (40–43). Intracellular NH<sub>4</sub><sup>+</sup> is then used to synthesize L-  
86 arginine from L-glutamate (25, 43). Arginine is assumed to be the major transport form of nitrogen  
87 from the ERM to IRM, where it is catabolized to NH<sub>4</sub><sup>+</sup> and excreted into the periarbuscular space  
88 (3, 43).

89 The fungus, in turn, is dependent on carbohydrates and lipids obtained from the plant host.  
90 Multiple sugar transporters have been found, which are likely involved in hexose transfer from the  
91 host plant to *R. irregularis* (31, 44). However, the sugars obtained from the plant are not sufficient  
92 for the fungus to complete its life cycle (i.e. formation of fertile spores). *R. irregularis* cannot  
93 synthesize fatty acids with chain length greater than eight due to the absence of the fatty acid  
94 synthase (FASI), and thus depends on fatty acids provided by the host plant (32, 33, 35, 45, 46).  
95 Most likely, lipid is transported as 2-monopalmitin; however, it has also been shown that *R.*  
96 *irregularis* is able to grow on myristate (47). These findings have been exploited to develop an  
97 axenic culture medium on which the obligate biotroph can grow up to the production of fertile spores  
98 (48).

99 The availability of an assembled genome for *R. irregularis* (49–52) largely facilitated the  
100 characterization of transporters and its lipid metabolism (45, 53), allowing us to draw conclusions  
101 about the metabolic capabilities of the obligate biotrophic fungus. Multiple studies performed gene  
102 expression profiling under various conditions, facilitating a deeper understanding of the *R.*  
103 *irregularis* metabolism and arbuscular mycorrhiza (5, 54–56). An annotated genome of an organism  
104 is also the basis for the generation of genome-scale metabolic models (GEMs) that offer the means  
105 to *in silico* probe the functional capabilities and physiological responses of the organism (57). GEMs  
106 have already been developed to analyze the interaction of a N-fixing bacterium *Sinorhizobium*  
107 *meliloti* and its host plant *Medicago truncatula* (58, 59). As a result, important features of the N  
108 exchange and co-dependent growth were revealed, leading to a better understanding of this  
109 symbiotic relationship. Such analyses for *R. irregularis* cannot be performed due to the lack of a  
110 high-quality GEM for this organism.

111 Availability of a GEM for *R. irregularis* can be particularly useful to dissect mechanisms  
112 underlying arbuscular mycorrhiza and to predict fungal nutrient conversions and exchange, directly  
113 affecting growth of the host plant. Here, we present a compartmentalized enzyme-constrained GEM  
114 for *R. irregularis*, termed iRi1574, which allows the integration and prediction of transcript and  
115 protein abundances for different growth scenarios. We then used the enzyme-constrained GEM of  
116 *R. irregularis* to predict protein abundances across four carbohydrate sources and three feeding  
117 concentrations; we also examined the predictions of growth and pathways that affect this complex  
118 phenotype based on experimental measurements of hyphal dry weight and protein content from  
119 Hildebrandt et al. (60). We show that the enzyme-constrained iRi1574 model results in predictions  
120 that correlate well with experimentally measured dry weight (as well as calculated growth rates)  
121 and allows us to probe the flux redistributions across three fungal structures using re-analysed  
122 published gene expression data (5). Thus, we lay the foundation for further in-depth analysis of *R.*  
123 *irregularis* metabolism, hypothesis testing regarding mechanism essential for arbuscular  
124 mycorrhiza, and metabolic engineering of this fungus to improve the effect on agriculturally relevant  
125 plant traits.

## 126 **Results and Discussion**

127

### 128 **Reconstruction of the genome-scale metabolic model of *R. irregularis***

129 Our first contribution is the generation of a GEM for *R. irregularis* encompassing all enzymatic  
130 functions annotated for this agronomically relevant fungus. The metabolic model can be used in  
131 combination with computational approaches from the constraint-based modelling framework to  
132 predict variety of metabolic phenotypes, including growth, in different scenarios (61, 62). The  
133 genome of *R. irregularis* (49, 51) was used as a starting point for the generation of the GEM using  
134 the KBase fungal reconstruction pipeline (63). The resulting draft model was first translated to a  
135 common namespace, based on augmenting a database of biochemical reactions, ModelSEED  
136 (34), since there were reaction and metabolite identifiers from published fungal models without  
137 cross references. We then added 198 transport reactions from the *Saccharomyces cerevisiae*  
138 iMM904 GEM (64) to improve the network connectivity (Suppl. Tab 8). We further expanded the list  
139 of reactions based on literature evidence for *R. irregularis* (Suppl. Tab 1). After these steps, the  
140 model was manually curated to ensure mass- and charge balancing. Finally, stoichiometrically  
141 balanced cycles were removed from the model to avoid simulations in which growth without  
142 available carbon source is possible (Supp. Note 1).

143 The manually curated GEM of *R. irregularis*, named iRi1574, consists of 1286 metabolites and  
144 1574 reactions in eight sub-cellular compartments, i.e. the cytosol, mitochondrion, peroxisome, the  
145 Golgi apparatus, Endoplasmic Reticulum, nucleus, vacuole, and an extracellular compartment. In  
146 total, 687 enzyme-coding genes are associated with 1054 (67%) reactions via gene-protein-

147 reaction (GPR) rules (Fig. 1A). Further, we cross-referenced both metabolites and reactions to  
148 commonly used biochemical databases to increase the comparability to other GEMs and to  
149 facilitate its future usage. A published cost-efficient medium, that is used in dual-compartment  
150 culture systems and includes: glycine, myo-Inositol, pyridoxine hydrochloride, thiamine  
151 hydrochloride, nicotinic acid, and essential minerals, is the default medium for simulations (65). The  
152 dependence of the growth of *R. irregularis* on lipid transferred from the host (most likely 16:0  $\beta$ -  
153 monoacylglycerol (32, 33)) was modelled by adding an exchange reaction for palmitate, which is  
154 added to the default medium.

155 Altogether, the iRi1574 model includes 13 metabolic subsystems (Fig. 1B). In total, 24% and  
156 13% of reactions take part in lipid and amino acid metabolism subsystems, respectively, which  
157 dominate the reconstruction (Fig. 1B). To model the lipid metabolism of *R. irregularis*, we relied on  
158 the gene annotations supported by literature (45, 66). Moreover, to incorporate experimentally  
159 measured lipid abundances (45, 67) into the biomass reaction, we used the SLIMEr method (68),  
160 whereby specific lipid species are split into their fatty acyl chains and backbone which are then  
161 combined using respective pseudoreactions. Hence, the number of lipid-related reactions and  
162 pseudoreactions is high compared to that of the remaining 11 metabolic subsystems. Based on  
163 literature evidence, we further added reactions that allow the production of ethylen (69), short-chain  
164 lipochitooligosaccharides (LCO) (70, 71) and vacuolar polyphosphate (72, 73). The respective end-  
165 products of these reactions are exported via sink reactions. Moreover, we added extracellular sink  
166 reactions for organic phosphate and ammonia as these molecules are known to be transported  
167 from the fungus to the host plant.

168 As only a small proportion of metabolites is annotated by the KEGG BRITE hierarchy (74), we  
169 used the ChEBI metabolite ontology (75) to structurally classify the considered metabolites. Due to  
170 the large number of reactions from lipid metabolism included in iRi1574, the proportions of lipids  
171 and fatty acyls are high (34%), followed by peptides/amino acids, organic-, and nucleic acids (Fig.  
172 1C). The class of 'Other' metabolites is dominated by carbonyl compounds, heterocyclic  
173 compounds and phospho sugars. Quality assessment tests with the iRi1574 model were performed  
174 employing the MEMOTE test suite (76), yielding an overall score of 72% (Suppl. Note 1, Suppl. File  
175 2).

## 176 **Comparison of iRi1574 to other fungal models**

177 As *R. irregularis* is phylogenetically distant from other fungi for which GEMs have been published,  
178 we next asked whether the phylogenetic relationship among these fungi is represented in the  
179 enzyme sets included in the respective GEMs. To this end, we assigned pathway information to the  
180 reaction in nine fungal models according to the classification contained in the YeastGEM v8.3.5  
181 (77) model (Suppl. Tab 2). To determine the overall similarity between two fungal models, we

182 determined the overlap in E.C. numbers per subsystem by using the Jaccard Index (JI). We  
183 observed that, in comparison to the nine compared fungal models, the iRi1574 showed the lowest  
184 JI, i.e. lowest overlap of E.C. numbers, for fatty acid metabolism (including synthesis and  
185 elongation), thiamine metabolism, glycerolipid, and nicotinate and nicotinamide metabolism  
186 (Figure S1). In contrast, the largest overlap was found for the pentose phosphate pathway, one  
187 carbon pool by folate, pantothenate and CoA biosynthesis as well as amino sugar and nucleotide  
188 sugar metabolism, to name a few (Figure S1). Further, we identified that are some fungal GEMs  
189 showing differences in comparison to iRi1574 with respect to particular metabolic subsystems; for  
190 instance, the model of *N. crassa* showed particular differences in the tricarboxylic acid (TCA) cycle  
191 and pyruvate metabolism, the model of *A. terreus* displays particular differences in purine  
192 metabolism, steroid biosynthesis, sphingolipid, and pyrimidine metabolism, and lipid metabolism,  
193 while the model of *P. chrysogenum* differed in sphingolipid metabolism and fatty acid elongation  
194 (Figure S1).

195 The previous comparison between the fungal models was conducted only with respect to  
196 overlap of E.C. numbers present in particular metabolic subsystems, and does not point at  
197 differences in the activity of these pathways and their contribution to the physiology of the modelled  
198 fungi. To address this issue, we employed Flux Balance Analysis (FBA)(78, 79), that facilitates  
199 simulation of growth at steady state in each of the fungal models by optimizing of the flux,  $v_{bio}$ ,  
200 through a biomass reaction that integrates the biomass precursors. This results in a linear  
201 optimization problem that imposes metabolic steady state and physiologically relevant bounds on  
202 reaction fluxes, i.e.

$$\begin{aligned} 203 \quad & \max v_{bio} \\ 204 \quad & \text{s.t.} \\ 205 \quad & \mathbf{S}\mathbf{v} = \mathbf{0} \\ 206 \quad & v_i^{min} \leq v_i \leq v_i^{max}, \forall i \in R, \end{aligned}$$

207 with  $S$  representing the stoichiometric matrix, including the molarity with which each substrate and  
208 product enter a reaction of the metabolic model,  $v$  stands for the flux distribution, and  $R$  denoting  
209 the set of reactions in the model. Since it is well-known that there are, often, multiple steady-state  
210 flux distributions,  $v$ , that achieve the same growth (80), to characterize the activity of a metabolic  
211 subsystem, we next determined the minimum and maximum values that the sum of fluxes of the  
212 reactions participating in a given subsystem attain at optimal growth (see Methods). Similarly, we  
213 determined the sums of fluxes from parsimonious FBA (pFBA) for each of the subsystems (see  
214 Suppl. Methods).

215 Following this analysis, we observed that the ranges between the maximal and minimal sums  
216 of fluxes are largely overlapping and are of similar widths across most of the compared models  
217 (Figure S2). Interestingly, the model for *P. Chrysogenum*, iAL1006, and the iRi1574 model showed  
218 narrower ranges compared to the remaining models, except for fatty acid metabolism. Moreover,  
219 we observed that the maximum sum of fluxes is similar across all fungal models (coefficient of  
220 variation,  $\overline{CV} = 0.6$ ), while minimal sums and sums from pFBA fluxes showed larger differences  
221 ( $\overline{CV} = 2.3$  and  $\overline{CV} = 2.6$ ). This suggests that these pathways are of differential importance for the  
222 models, since the minimal sum of fluxes provides an indication of how much flux must at least pass  
223 through these reactions to guarantee optimal growth. In conclusion, we find differences in both E.C.  
224 number overlap as well as in the pathway activities between the iRi1574 and other fungal models,  
225 indicating that iRi1574 is both structurally and functionally distinct from other fungal GEMs.

### 226 **iRi1574 can predict phenotypes of *R. irregularis* in line with experimental observations**

227 We employed the assembled GEM to predict physiological traits for which there exists sufficient  
228 evidence and, thus, can be used to validate the performance of the model. A first question is how  
229 many of the reactions in the assembled model can carry flux. For these simulations, the M-  
230 medium(65, 81) was used, which was enriched with palmitate, D-glucose, and D-fructose, assumed  
231 to be supplied by the plant (Table S11). Using this default medium, 658 (42%) reactions were  
232 blocked (i.e. could not carry flux in any steady state supported by the model) of which 105 are  
233 transport reactions for extracellular metabolites. This is in line with the percentage of blocked  
234 reactions in the fungal models used in the comparison above (from 11.9% in iJL1454 to 49.9% in  
235 iRL766).

236 An important characteristic of the symbiotic relationships formed by *R. irregularis* is its  
237 dependence on association with the plant host to ultimately form fertile spores (46). According to  
238 recent findings, lipids are supplied by the plant symbiont, as *R. irregularis* does not possess the  
239 required enzyme set for *de novo* synthesis of long-chain fatty acids from hexoses (35, 45). More  
240 specifically, 2-monopalmitate was proposed as a likely candidate for the lipid exchange from plant  
241 to fungus (32, 33). Concordantly, axenic growth of this fungus is only possible when fatty acids are  
242 supplied in the medium (47, 82). Hence, the default medium used in the study includes palmitate  
243 as a lipid source. Indeed, simulations in which palmitate influx is blocked lead to no growth with or  
244 without consideration of other carbon sources.

245 It has been shown that *R. irregularis* is able to utilize additional carbon sources (30, 47, 83). The  
246 ability of the model to reproduce these finding was assessed by growth simulations on single  
247 carbon sources in the default medium, while restricting the uptake of palmitate to a minimal value  
248 that still guarantees optimal growth ( $8.46 \text{ mmol } gDW^{-1}h^{-1}$ ). As a result, we simulated growth on



249 11 carbon sources by using FBA (see above), resulting in different growth rates (Figure S3). Here,  
250 we observed the highest growth rates for trehalose, followed by D-glucose, D-fructose, melibiose,  
251 and raffinose. The observed high growth rate with trehalose as a carbon source is not surprising,  
252 given that it directly enters the biomass reaction. The equal growth rates obtained upon adding D-  
253 glucose, D-fructose, raffinose, and melibiose indicated that D-glucose, D-fructose, as well as D-  
254 galactose as a breakdown product from raffinose can be used with equal efficiency. The efficiency  
255 of the remaining carbon sources differed due to the differences in their breakdown pathway and  
256 additional modifications (e.g. phosphorylation, reduction).

257

258 Moreover, it has been reported that the addition of myristate to the medium leads to enhanced  
259 growth of *R. irregularis* (47). We found that optimum growth is, as expected, associated with a fixed  
260 value of palmitate influx of  $8.46 \text{ mmol gDW}^{-1} \text{ h}^{-1}$ . Further, myristate is not utilized if additional  
261 carbon sources are unlimitedly available in the medium, which is in contrast to the experimental  
262 findings of Sugiura and co-workers, who found that the addition of myristate lead to an increment  
263 in growth irrespective an additional carbon source (47). Therefore, we asked if the reduced growth,  
264 due to the suboptimal scenario of fixing the palmitate influx to 10% of the minimum at optimal  
265 growth, can be complemented by adding myristate. Indeed, the model predicted that growth  
266 increased by 1.5% in comparison to the suboptimal scenario. When additional carbon sources (i.e.  
267 D-glucose, D-fructose, glycine, and myo-inositol) are allowed, with uptake rates restricted to their  
268 minimal fluxes at optimal growth, this increase in growth amounts to 9.7% (see below for the  
269 predictions from the enzyme-constrained model).

270 Another important transport process described for this symbiosis is the transport of Pi from  
271 fungus to the host plant (38). We found that the reconstructed model predicts export of Pi at optimal  
272 growth (Suppl. Tab 3 for FVA), in line with evidence (38). These results corroborate the quality of  
273 the functionally relevant predictions based on the developed iRi1574 model.

#### 274 **Protein usage with different carbon sources**

275 Enzyme-constrained GEMs have been developed for *S. cerevisiae* and *E. coli* (68, 84, 85),  
276 demonstrating improved prediction of metabolic phenotypes in contrast to the classical FBA-based  
277 models. In enzyme-constrained GEMs, the fluxes of reactions are bounded by the catalytic  
278 efficiency ( $k_{cat}$  parameters) and the abundance of the respective enzyme(s) (86); these models  
279 also include constraints on the total enzyme content, borrowing from the initial idea proposed in  
280 FBA with molecular crowding (87, 88). An enzyme-constrained GEM can be used to predict not  
281 only growth, but also distribution of the total enzyme content across the different reactions and  
282 pathways. To generate an enzyme-constrained GEM for *R. irregularis*, we made use of 1214  $k_{cat}$

283 parameters, of which 430 were measured for fungi, that covered 57.4% of reactions included in the  
284 model (with all irreversible reactions, see Methods). We then employed an extension of MOMENT  
285 (84), a constraint-based approach that facilitates the integration and prediction of protein  
286 abundance by considering data on the  $k_{cat}$  values. In addition to a molecular crowding constraint  
287 (Eq. 5, Methods) (84, 87, 88) similar to GECKO (68), we introduced a constraint to model enzyme  
288 promiscuity (Eq. 4), resulting in the extended method we refer to as eMOMENT. Missing turnover  
289 numbers were accounted for by assigning the median of the assigned  $k_{cat}$  values.

290 Here, we first revisit the results based on FBA with respect to growth on myristate and export of  
291 Pi. Without additional constraints in the enzyme constrained iRi1574 model, the positive effect of  
292 myristate uptake on growth could not be reproduced, since myristate is catabolized via peroxisomal  
293  $\beta$ -oxidation and the expression of the required enzymes is not outweighed by the benefit of  
294 generating acetyl-CoA from myristate. However, when the allocation of total protein is shifted from  
295 the optimal ratio towards increased abundances of peroxisomal proteins (suppl. Methods), the  
296 addition of myristate can increase growth compared to the suboptimal scenario (Figure S4).  
297 Further, we found that using the default medium, like in the FBA model above, the enzyme-  
298 constrained model predicts export of Pi at optimal growth in the range  $[0, 171.9] \text{ mmol } gDW^{-1}h^{-1}$   
299 (Suppl. Tab 4). Therefore, the observations made for the FBA model with these important  
300 phenotypes also hold for the enzyme-constrained model.

301 To test the performance of the enzyme-constrained variant of the iRi1574 model, we made use  
302 of published dry weight and protein content available for 12 combinations of four carbon sources  
303 (i.e. D-glucose, D-fructose, raffinose, and melibiose) at three different concentrations (i.e. 10 mM,  
304 100 mM, 1 M) (60). These data were generated by using the *G. intraradices* strain Sy167 (60),  
305 which is the closest species to *R. irregularis* for which this kind of measurements are available to  
306 date. The different media conditions were modelled by adding each carbohydrate to the default  
307 medium as a single carbon source, while the respective concentrations were modelled as  
308 proportional uptake fluxes considering kinetic parameters of the respective transport reactions (for  
309 more detail see Methods section). Like in the findings based on FBA, above, palmitate was present  
310 in the default medium since growth without palmitate is not possible, irrespective of additional  
311 supply of carbohydrates (45, 47). To avoid compensation of lower carbohydrate supply by  $\beta$ -  
312 oxidation of palmitic acid, we limited its uptake to the flux value obtained at optimal growth predicted  
313 by FBA.

314 We next compared the predictions of growth from the eMOMENT approach with those from FBA  
315 (i.e. without considering enzyme constraints), with the same restrictions on palmitate uptake (Suppl.  
316 Tab 5). We observed that the additional constraints on protein abundances largely improved the  
317 quality of the prediction (Fig. 2) and resulted in values of the same order as growth rates calculated

318 from dry weights and grow duration (suppl. Methods). We found that the predicted growth rates  
319 were significantly correlated with the measured values for hyphae dry weight (Spearman correlation  
320 coefficient,  $\rho_S = 0.74, P < 0.01$ , Fig. 2) and were collinear ( $\rho_S = 1.0$ ) with the protein content. In  
321 contrast, FBA predicted a statistically significant, negative correlation ( $\rho_S = -0.69, P < 0.05$ )  
322 demonstrating that the predictions from this approach are not in line with the experimental  
323 observations. The respective values for Pearson correlation were  $\rho_P = 0.80$  ( $P < 0.01$ ), for the  
324 enzyme-constrained models, and  $\rho_P = -0.62$  ( $P < 0.05$ ), for the FBA model. Using FBA, we  
325 observed that growth increased with the concentration of the respective carbon source despite  
326 rescaling of biomass coefficients, while this was not the case when using the eMOMENT approach.  
327 In fact, this relationship was only observed for D-glucose and raffinose, which is broken down to  
328 sucrose and D-galactose extracellularly. Hence, the iRi1574 model can reliably predict growth  
329 based on different carbon sources when protein content and protein-reaction associations are  
330 considered.

331 The applied approach to integrate total protein content allowed us to predict not only optimal  
332 growth, but also abundances of individual proteins for the 12 combinations of carbon source and  
333 concentrations considered. Since multiple allocations of proteins to enzyme complexes and  
334 reactions can lead to optimal growth, we sampled the set of feasible enzyme abundances  
335 (Methods) at 99% of the respective optima. The resulting predictions on alternative enzyme  
336 allocation at optimal growth were used to investigate the plasticity of enzyme allocation under the  
337 different conditions. We quantified the plasticity in the abundance of each protein by the coefficient  
338 of variation (CV) across the simulated conditions. The CV was calculated for predicted protein  
339 abundance and reaction flux across the 12 growth scenarios (Suppl. Tab 6 and 7). To illustrate the  
340 findings, we represented the distribution of CVs across the 13 metabolic subsystems (Fig. 3A-B).  
341 The highest median CV was found for enzymes within the amino sugar and nucleotide sugar  
342 metabolism ( $\overline{CV} = 16.65$ ), carbohydrate metabolism ( $\overline{CV} = 9.71$ ), and nucleotide metabolism ( $\overline{CV} =$   
343  $9.35$ ). In contrast, metabolism of cofactors and vitamins and transport reactions showed the lowest  
344 plasticity in protein abundance ( $\overline{CV} < 0.3$ ). Regarding reaction fluxes, the subsystems containing  
345 the most plastic reactions were found within sink reactions ( $\overline{CV} = 13.77$ ) and amino sugar and  
346 nucleotide sugar metabolism ( $\overline{CV} = 12.55$ ).

347 To assess whether the plasticity in flux is dependent on the variability in enzyme abundance of  
348 the catalysing enzymes, we compared the respective sets at the extreme ends of CV distribution  
349 (10% and 90% quantiles) between protein abundance and reaction fluxes (Figure 3C). Among the  
350 89 reactions associated to enzymes with variable abundance ( $CV \geq 49.38$ ), 28 were found to be  
351 also highly plastic in flux. Conversely, we found six reactions with low flux CV associated with seven  
352 high abundance CV proteins. Four out of these genes were not promiscuous, and were associated

353 with single reactions of high CV. The associated reactions are involved in terpenoid backbone  
354 biosynthesis and nucleotide metabolism. Hence, variation in enzyme abundance cannot fully  
355 explain the plasticity in flux. Since pH differences (affecting enzyme activity) are expected to lead  
356 to systemic changes, we conclude that the plasticity in flux for these selected reactions is largely  
357 driven by metabolite concentration, rather than enzyme abundance.

358 Among the 78 reactions with highly variable fluxes ( $CV \geq 39.79$ ), the majority lies within the lipid  
359 and fatty acid metabolism (47) and transport reactions (10). The subset of reactions in lipid  
360 metabolism were found to act mainly in lipid degradation but also in the synthesis of very long  
361 chain fatty acids. This result indicates a trade-off between lipid synthesis and  $\beta$ -oxidation depending  
362 on the type and concentration of the carbon source.

### 363 **Prediction of growth for three fungal structures**

364 As obligate biotrophs, AMF are dependent on the association with a host plant for carbohydrates  
365 and lipids (2, 3). Three major fungal structures are discriminated for the fungus: extraradical  
366 mycelium (ERM), intraradical mycelium (IRM) and arbuscles (ARB), which differ from each other in  
367 the proximity of association with the host plant. Thus, we investigated growth and underlying flux  
368 distributions comparing these three structures of *R. irregularis*. To this end, we used published  
369 expression data from (5) to examine growth and differential reaction fluxes between these three  
370 structures.

371 We observed an increase in growth upon association of the fungus with the host plant (Fig. 4A),  
372 which was expected since a tighter association with the host plant and hence increased nutrient  
373 uptake allows faster growth. Since the total protein content remained the same over the simulations  
374 for all three structures, the changes in growth likely result from increased flux through a subset of  
375 reactions responsible for growth, due to larger upper bounds of these reactions. One reason for  
376 this could be changes in the relative abundances of individual proteins due to changes in transcript  
377 abundances that were used to calculate the upper bounds. To determine differential reactions, we  
378 sampled 5000 flux distributions for each structure and compared the resulting flux values for each  
379 reaction using the non-parametric common-language effect size ( $A_w$  (89), Suppl. Tab 8). We used  
380 three different thresholds for  $A_w$  (i.e. 0.6, 0.7, 0.8) to find differentially activated reactions between  
381 each pair of structures. By using 0.6 as a threshold, we found that mainly reactions of the amino  
382 acid metabolism exhibited differential fluxes between each pair of structures, followed by reactions  
383 in metabolism of cofactors and vitamins, carbohydrate, lipid, and nucleotide metabolism (Fig. 4B).  
384 Upon increasing the threshold to 0.7, we found only two reactions to be differentially activated  
385 between the ERM compared IRM and ARB, which were both involved in riboflavin biosynthesis  
386 (KEGG M00911) (Fig. 4B). Moreover, eight reactions from metabolism of cofactors and vitamins  
387 were differential between IRM and ARB. When the threshold was increased to 0.8, only one

388 reaction was found to differ between IRM and ARB, namely the coproporphyrinogen: oxygen  
389 oxidoreductase (E.C. 1.3.3.3). These results suggest that substantial rerouting of fluxes within  
390 these pathways might occur upon establishing the fungal-plant interface. However, differences in  
391 predicted growth may not exclusively result from large changes in for few reactions. It is likely, that  
392 small changes in a number of other reactions also contribute to an increased growth rate.

393

## 394 **Conclusion**

395 Although *R. irregularis* is one of the most extensively studied AMF that forms symbioses with major  
396 crops, insights from the annotation of its enzymatic genes, the extensive body of evidence about  
397 its physiological and molecular responses to different environmental stimuli, and mutual effects on  
398 plants with which it interacts have not yet been systematically investigated in the context of  
399 metabolic modelling. The constraint-based modelling framework allows us to dissect the molecular  
400 mechanisms that underpin these responses and also to suggest targets for future metabolic  
401 engineering in order to boost the beneficial effects of this AMF. However, achieving this aim  
402 requires the assembly of a high-quality large-scale model that leads to accurate quantitative  
403 predictions of multiple traits in different scenarios.

404 Here, we presented the enzyme-constrained iRi1574 GEM of *R. irregularis* based on the KBase  
405 fungal reconstruction pipeline followed by consideration and inclusion of exhaustive literature  
406 research as well as manual curation for consistency, mass- and charge balance. One possible  
407 caveat of using fungal reconstruction pipelines is that the resulting model may be very similar to  
408 the employed templates. Nevertheless, by conducting comparative analysed of the enzyme set of  
409 iRi1574 and that of published fungal models, we demonstrated the specificity of iRi1574 and its  
410 ability to capture the particularities of *R. irregularis* metabolism. More importantly, validation tests  
411 demonstrated that iRi1574 can: (1) accurately predict increased growth on myristate with minimal  
412 medium with the FBA model as well as, under additional constrains on enzyme distribution, in the  
413 enzyme-constrained model, (2) predict growth that is highly correlated with hyphal dry weight  
414 measured in a close relative (*Glomus intraradices* Sy167, neighbouring clade), when considering  
415 enzyme constraints, and (3) growth rate increases with tighter association with the host plant,  
416 based on integration of relative transcriptomics data. The extensively validated model was used to  
417 show that the transition from IRM to ARB could be linked with changes in amino acid and cofactor  
418 biosynthesis.

419 This first model of an AMF can be coupled with root-specific models of model plants to  
420 investigate the effects of symbiosis. Further, a 2D growth simulation approach (62) can be  
421 employed to obtain a realistic growth measure for hyphal spread. In addition, the iRi1574 model  
422 can be used to mechanistically dissect the interactions of species in fungal and bacterial  
423 communities that jointly affect plant performance (90). Most importantly, one can begin to design

424 metabolic engineering strategies to improve desired traits in *R. irregularis*, study the effect of the  
425 modifications on plant performance by coupling metabolic models of the symbionts, and to further  
426 refine the model based on integration of heterogeneous molecular data. Altogether these modelling  
427 efforts can guide future reverse genetics tools used to understand the functional relevance of  
428 metabolic genes in *R. irregularis* in shaping plant traits.

429

430

## 431 **Materials and Methods**

432

433 **Draft model generation.** The genome of *Rhizophagus irregularis* DAOM 181602=DAOM 197198  
434 (GCF\_000439145.3) (49, 51) served as the basis for the genome-scale metabolic reconstruction.  
435 The initial draft model was obtained from KBase (63) using the 'Build Fungal Model' app (Oct 15,  
436 2018; narrative ID 36938). The resulting model was gap-filled with the help of the KBase app 'Gapfill  
437 Metabolic Model' app using the complete medium. A set of 35 additional reactions was required to  
438 simulate growth. This set of added reactions was manually curated in the next step of model  
439 refinement. The gap-filled model was then downloaded in SBML format and further modified within  
440 MATLAB (91) using functions of the COBRA toolbox (92).

441 **Model curation.** To enhance connectivity between the cellular compartments, 198 transport  
442 reactions were added from the yeast iMM904 metabolic model (64). The imported transport  
443 reactions were validated during the next curation steps. Out of all added transport reactions, 71  
444 were kept in the model despite missing literature evidence (Suppl. Tab 9). Next, the metabolite and  
445 reaction identifiers were translated, whenever possible, to the ModelSEED namespace (34). This  
446 step was necessary since the identifiers resulted from 14 different models and the catalyzed  
447 reactions mostly could not be identified. Moreover, this led to a higher connectivity of the network  
448 as identical metabolites and reactions were reconciled. Further, cross-references were added to  
449 BiGG (93), MetaCyc (94), KEGG (74), MetaNetX (95), PubChem (96), and E.C. numbers.

450 Metabolite formulas were added from PubChem and adapted to the net charge at the average  
451 cytosolic pH of 6.2 (97) using the ChemAxon Marvin software (Marvin 17.21.0, 2017,  
452 <http://www.chemaxon.com>). With elemental compositions and metabolite charges available, the  
453 model was manually mass- and charge balanced.

454 After these steps, additional reactions were added from various literature sources. Most of the  
455 lipid metabolism is based on the results from (45), including: Sterol metabolism, Fatty acid  
456 synthesis, -elongation, and -degradation, glycerolipid metabolism, sphingolipid metabolism.  
457 Plasma membrane transporters were added with literature evidence from multiple sources (38, 44,  
458 53, 98). Furthermore, important dead-end metabolites were resolved manually by adding incident  
459 reactions with genetic evidence or transport reactions.

460 The biomass reaction was adapted from the default fungal biomass reaction added during the  
461 automated reconstruction process (Suppl. Tab 10). Subsequently, the unknown coefficients in the  
462 biomass reaction were re-scaled such that the sum of coefficients multiplied with the respective  
463 molecular weight equals  $1 \text{ g } gDW^{-1}$  (99). Due to missing experimental data, we set the growth-  
464 associated ATP maintenance reaction (GAM) to 60 molecules ATP  $gDW^{-1}$  as taken from the  
465 KBase default fungal biomass, which is in line with the average value from seven published fungal

466 models ( $68.87 \text{ mmol gDW}^{-1}\text{h}^{-1}$ , Suppl. Tab 11). The non-growth associated ATP maintenance  
467 reaction (NGAM) was fixed to the average of from seven published fungal models ( $3.21$   
468  $\text{mmol gDW}^{-1}\text{h}^{-1}$ , Suppl. Tab 11). For the lipid component in the biomass reactions, the SLIMER  
469 formalism was used (100) and coefficients of tail and backbone pseudometabolites were adjusted  
470 to render the model feasible for simulations by running a quadratic program to minimize factors to  
471 be added to the respective coefficients.

472 Stoichiometrically-balanced cycles (SBC) were then removed by repeatedly applying Flux  
473 Variability Analysis (FVA) and correcting reaction reversibility or adding additional reactions as  
474 suggested in (101). For the following analyses, all reversible reactions were split into two  
475 irreversible reactions.

476 **Short-chain chitooligosaccharides (CO) and lipochitooligosaccharides (LCO).** Synthesis  
477 reactions for LCOs were added by first modelling the synthesis of COs with chain lengths 3-6 with  
478 subsequent acetylation reactions adding 16:0, 16:1 $\Delta$ 9( $\omega$ 7), 18:0, and 18:1 $\Delta$ 9( $\omega$ 9) fatty acids  
479 leading to 16 different LCO species (70, 71).

480 **Transcriptomic data.** Structure-dependent RNA-seq data were obtained as raw sequence reads  
481 (GSE99655) (5). The reads were quality trimmed using Trimmomatic-0.39 (102) and mapped to  
482 the *R. irregularis* genome using STAR 2.7.3a (103). The read quantification was performed using  
483 HTSeq count (104). The average over the three replicates was used for further analysis. The  
484 protein identifiers from the original study were translated to the identifiers of the genome annotation  
485 that was used for the metabolic reconstruction using local tblastn (105, 106) using the BLOSUM90  
486 scoring matrix and a cutoff E-value of 10E-90. The average Spearman correlation between the  
487 published and re-analysed values for the secreted proteins (SP) was 0.8, which confirms the  
488 previous results given different analysis software and possible mapping errors using tblastn.

489 **Turnover numbers.** For the assignment of  $k_{cat}$  values to reactions, a similar approach as in  
490 GECKO (68) was applied. First, turnover values for all E.C. numbers in the model across all  
491 organisms and according lineages were obtained from BRENDA (107), SABIO-RK (108) and  
492 UniProt (109), respectively. For each E.C. number assigned to a reaction, all matching  $k_{cat}$  values  
493 were obtained and, if possible, filtered for substrate matches and enzymes from the fungi kingdom.  
494 If no match for the complete E.C. number was found the same procedure was applied to the same  
495 E.C. number pruned to a lower level. Among the obtained values, the maximum  $k_{cat}$  value was  
496 assigned to the respective reaction. The distribution and numbers of matched  $k_{cat}$  values per  
497 subsystem, as well as a comparison to  $k_{cat}$  values in the YestGEM v8.3.4 are shown in Figures  
498 S5A and B. The median of all non-zero values was used for metabolic reactions without a matched  
499  $k_{cat}$  value. To arrive at units of  $\text{h}^{-1}$ , all turnover numbers were multiplied by 3600.



500 **Enzyme usage under different growth conditions.** To predict the enzyme abundances with  
 501 different media conditions, four different carbon sources (i.e. D-glucose, D-fructose, raffinose,  
 502 melibiose) were added to the minimal medium (65) (Suppl. Tab 12) as single carbon sources.  
 503 These carbohydrates were selected, as hyphal weight and protein content were available for them  
 504 at three different concentrations (i.e. 10, 100, and 1000 mM) (60). As an exception, palmitate was  
 505 retained in the medium as it must be supplied to the fungus in order to allow for growth (45, 47).  
 506 We used kinetic parameters (i.e.  $V_{max}$  and  $K_m$ ) of *S. cerevisiae* monosaccharide transporters to  
 507 model the influx of D-glucose, D-fructose, and D-galactose (results from breakdown of both  
 508 raffinose and melibiose, Suppl. Tab 13) (110, 111). The respective upper bound for the transporters  
 509 was calculated as

$$510 \quad v = \frac{V_{max} \cdot [S]}{K_m + [S]} \quad (1)$$

511 Further, the import of palmitate was restricted to the flux value of  $8.46 \text{ mmol } gDW^{-1} h^{-1}$  at optimal  
 512 growth as predicted by FBA.

513 The following MILP, which we termed eMOMENT, imposes constraints which were adopted from  
 514 the MOMENT approach (84), which were extended by an additional constraint (Eq. 4):

$$515 \quad \max v_{bio}$$

516 **s.t.**

$$517 \quad \mathbf{Sv} = \mathbf{0} \quad (2)$$

$$518 \quad 0 \leq v_i \leq E_i^r \cdot kcat_i^{max}, \forall i \in R \quad (3)$$

$$519 \quad \sum_{i \in GPR_k} E_{k,i}^r = E_k^g, \forall k \in G \quad (4)$$

$$520 \quad \sum_k E_k^g \cdot MW_k \leq C, \forall k \in G \quad (5)$$

$$521 \quad \alpha \cdot y_k \leq E_k^g \leq \beta \cdot y_k, \forall k \in G \quad (6)$$

$$522 \quad y_k \in \{0,1\} \quad (7)$$

$$523 \quad \alpha = 10^{-10} \text{ mmol } gDW^{-1}, \quad \beta = 1 \text{ mmol } gDW^{-1} \quad (8)$$

524 \*constraints on  $E^r_j$  imposed by the GPR rules\*

525  $R$  and  $G$  represent the sets of reactions and genes. The molecular weight in  $g \text{ mmol}^{-1}$  of a protein  
 526  $k$  is given by  $MW_k$ . The constraint in Eq. (3) imposes an upper limit on the flux through reaction  $i$   
 527 which is the product of the reaction-specific turnover rate and the enzyme abundance  $E^r_i$  available

528 for this reaction. Further, binary variables  $y$  were introduced to indicate that the respective genes  
529 are expressed ( $y = 1$ ) or not ( $y = 0$ ). This was done to enforce a lower bound  $\alpha$  for the abundance  
530 of expressed genes to avoid numerical problems. The value for  $E^r_i$  is determined by the GPR rules.  
531 To model the GPR rules, the following constraints were applied recursively in case of complex  
532 rules:

533 1) A AND B  $\rightarrow E^r_i = \min(E^g_A, E^g_B)$

534  $E^r_i \leq E^g_A$

535  $E^r_i \leq E^g_B$

536 2) A OR B  $\rightarrow E^r_i = E^g_A + E^g_B$

537  $E^r_i \leq E^g_A + E^g_B$

538 Further, the total protein content  $C$  was determined by the experimentally-measured protein  
539 contents at the given concentrations (60). To account for changing protein contents, the coefficients  
540 of the biomass reaction were rescaled to the respective values for  $C$ . The proportions of the  
541 remaining biomass components were conserved when they were adapted to the new residual mass  
542 fraction ( $1 \text{ g gDW}^{-1} - C$ ).

543 We extended the constraints we borrowed from the MOMENT approach by one additional  
544 constraint (Eq. (4)), which takes the promiscuity of proteins for multiple reactions into account.  
545 Hence, the abundance of protein  $k$  is smaller than or equal to the sum of enzyme abundances  
546 across all reactions with which it is associated.

547 The feasible abundance ranges for all proteins were determined by individual minimization and  
548 maximization for  $E^g_i$  at optimal growth, similar to FVA. Using these, we sampled 1000 abundances  
549 compatible with the constraints above, by finding the closest vector of abundances to a randomly  
550 created set of abundances  $E^{g*}$  within the feasible ranges determined in the step before:

551 
$$\min |E^{g*} - E^g|$$

552 **s.t.**

553 
$$v_{bio} \geq 0.99 \cdot v_{bio}^{opt} \quad (9)$$

554 \*constraints Eq 2 - Eq 8\*

## 555 **Metabolic changes between fungal structures**

556 For this experiment, all four carbon sources that were used in the analysis above, were added to  
557 the same minimal medium. Similarly, the upper bounds on monosaccharide import were calculated

558 using transporter kinetics from *S. cerevisiae*, considering only the maximum concentration of 1 M.  
 559 Across the calculated values, the maximum possible influx for each monosaccharide was selected.  
 560 For this experiment, palmitate was also retained in the medium with the same upper limit as  
 561 described before. For each of the three structures (ERM, IRM, ARB), the abundance of each protein  
 562  $tc^p_i$  was calculated from the relative transcriptomic counts per gene  $tc^g_i$  (not considering  
 563 alternative splicing and post-translational modifications):

$$564 \quad tc_k^{g'} = \frac{tc_k^g}{\sum_k tc_k^g}, \quad (10)$$

$$565 \quad tc_k^p = \frac{tc_k^{g'} \cdot C}{MW_k}. \quad (11)$$

566 The total protein content  $C$  was set to the maximum value measured across all growth conditions  
 567 used in the experiment before ( $C = 0.106 \text{ g } gDW^{-1}$ ). By applying this transformation, we assume  
 568 that transcript levels correlate with protein abundances, which is not necessarily true and can lead  
 569 to over- or underestimation of protein levels. However, this represents the closest approximation of  
 570 protein levels in the absence of quantitative proteomics data.

571 To conduct FBA, the transformed transcript count  $tc^r_i$  for the reaction was first calculated by  
 572 applying the GPR rules taking the minimum  $tc^p$  value for complexes (AND) and the maximum for  
 573 isozymes (OR). Finally, the upper limit for a reaction  $i$  was defined as the product of estimated  
 574 enzyme abundance and the respective turnover value:

$$575 \quad v_i \leq k_{cat,i} \cdot tc^r_i. \quad (12)$$

576 Growth was predicted for each of the three structures by FBA using the adapted reaction limits.  
 577 After this, FVA was used to determine the feasible ranges for each reaction while keeping the  
 578 growth at 99% of the optimum. These ranges were used as the limits for the sampling procedure  
 579 which attempts to find an optimal solution with minimal distance to a random flux vector  $v^*$ :

$$580 \quad \min |v^* - v|$$

581 **s.t.**

$$582 \quad Sv = 0$$

$$583 \quad v_i \leq k_{cat,i} \cdot tc^r_i, \forall j \in R \quad (13)$$

$$584 \quad v_{bio} \geq v_{bio}^{opt}$$

585

586 Like this, 5000 points were sampled and used for a reaction-wise comparison between the three  
587 structures. To this end, the non-parametric estimate for common language  $A_w$  (89) was used to  
588 determine substantial changes of reaction flux between each pair of structures:

$$589 \quad A_w = \frac{(\#(p > q) + 0.5 \cdot (p = q))}{(n_1 \cdot n_2)}. \quad (14)$$

590 The variables  $p$  and  $q$  represent the vectors of sampled fluxes for the same reaction at two different  
591 structures.

## 592 Data and code availability

593 All procedures, data, and approaches used are available at  
594 <https://github.com/pwendering/RhiirGEM>.

595

## 596 Acknowledgments

597

598 Z.N would like to acknowledge the support from the Max Planck Society. Z.N. and P.W. would like  
599 to acknowledge the funding from the Research Focus “Evolutionary Systems Biology” of the  
600 University of Potsdam.

601

602

603

## 603 References

- 604 1. Smith S, Read D. 2008. Mycorrhizal Symbiosis, 3rd ed. Academic Press, London.
- 605 2. Parniske M. 2008. Arbuscular mycorrhiza: The mother of plant root endosymbioses. *Nat*  
606 *Rev Microbiol.* *Nat Rev Microbiol.*
- 607 3. Wipf D, Krajinski F, van Tuinen D, Recorbet G, Courty PE. 2019. Trading on the  
608 arbuscular mycorrhiza market: from arbuscules to common mycorrhizal networks. *New*  
609 *Phytol* 223:1127–1142.
- 610 4. Stockinger H, Walker C, Schüßler A. 2009. “*Glomus intraradices* DAOM197198”, a model  
611 fungus in arbuscular mycorrhiza research, is not *Glomus intraradices*. *New Phytol*  
612 183:1176–1187.
- 613 5. Zeng T, Holmer R, Hontelez J, Lintel-Hekkert B, Marufu L, Zeeuw T, Wu F, Schijlen E,  
614 Bisseling T, Limpens E. 2018. Host- and stage-dependent secretome of the arbuscular  
615 mycorrhizal fungus *Rhizophagus irregularis*. *Plant J* 94:411–425.
- 616 6. Zhao S, Chen A, Chen C, Li C, Xia R, Wang X. 2019. Transcriptomic analysis reveals the  
617 possible roles of sugar metabolism and export for positive mycorrhizal growth responses  
618 in soybean. *Physiol Plant* 166:712–728.
- 619 7. Li Z, Ngwene B, Hong T, George E. 2019. Effects of nitrogen feeding for extraradical  
620 mycelium of *Rhizophagus irregularis* maize symbiosis incorporated with phosphorus  
621 availability. *J Plant Nutr Soil Sci* 182:647–655.
- 622 8. Yang Q, Ravnskov S, Neumann Andersen M. 2020. Nutrient uptake and growth of potato:  
623 Arbuscular mycorrhiza symbiosis interacts with quality and quantity of amended biochars.  
624 *J Plant Nutr Soil Sci* 183:220–232.
- 625 9. Chaudhary V, Kapoor R, Bhatnagar AK. 2008. Effectiveness of two arbuscular mycorrhizal  
626 fungi on concentrations of essential oil and artemisinin in three accessions of *Artemisia*  
627 *annua* L. *Appl Soil Ecol* 40:174–181.
- 628 10. Tekaya M, Mechri B, Mbarki N, Cheheb H, Hammami M, Attia F. 2017. Arbuscular  
629 mycorrhizal fungus *Rhizophagus irregularis* influences key physiological parameters of

- 630 olive trees (*Olea europaea* L.) and mineral nutrient profile. *Photosynthetica* 55:308–316.
- 631 11. Wahbi S, Prin Y, Maghraoui T, Sanguin H, Thioulouse J, Oufdou K, Hafidi M, Duponnois  
632 R. 2015. Field Application of the Mycorrhizal Fungus *Rhizophagus irregularis* Increases  
633 the Yield of Wheat Crop and Affects Soil Microbial Functionalities. *Am J Plant Sci*  
634 06:3205–3215.
- 635 12. Goicoechea N, Bettoni MM, Fuertes-Mendizábal T, González-Murua C, Aranjuelo I. 2016.  
636 Durum wheat quality traits affected by mycorrhizal inoculation, water availability and  
637 atmospheric CO<sub>2</sub> concentration. *Crop Pasture Sci* 67:147.
- 638 13. Todeschini V, Aitlahmidi N, Mazzucco E, Marsano F, Gosetti F, Robotti E, Bona E, Massa  
639 N, Bonneau L, Marengo E, Wipf D, Berta G, Lingua G. 2018. Impact of beneficial  
640 microorganisms on strawberry growth, fruit production, nutritional quality, and volatilome.  
641 *Front Plant Sci* 9:1611.
- 642 14. Navarro JM, Morte A. 2019. Mycorrhizal effectiveness in *Citrus macrophylla* at low  
643 phosphorus fertilization. *J Plant Physiol* 232:301–310.
- 644 15. Rivera-Becerril F. 2002. Cadmium accumulation and buffering of cadmium-induced stress  
645 by arbuscular mycorrhiza in three *Pisum sativum* L. genotypes. *J Exp Bot* 53:1177–1185.
- 646 16. Porrás-Soriano A, Soriano-Martín ML, Porrás-Piedra A, Azcón R. 2009. Arbuscular  
647 mycorrhizal fungi increased growth, nutrient uptake and tolerance to salinity in olive trees  
648 under nursery conditions. *J Plant Physiol* 166:1350–1359.
- 649 17. Cattani I, Beone GM, Gonnelli C. 2015. Influence of *Rhizophagus irregularis* inoculation  
650 and phosphorus application on growth and arsenic accumulation in maize (*Zea mays* L.)  
651 cultivated on an arsenic-contaminated soil. *Environ Sci Pollut Res* 22:6570–6577.
- 652 18. Zhu X, Song F, Liu F. 2016. Altered amino acid profile of arbuscular mycorrhizal maize  
653 plants under low temperature stress. *J Plant Nutr Soil Sci* 179:186–189.
- 654 19. Calvo-Polanco M, Sánchez-Romera B, Aroca R, Asins MJ, Declerck S, Dodd IC,  
655 Martínez-Andújar C, Albacete A, Ruiz-Lozano JM. 2016. Exploring the use of recombinant  
656 inbred lines in combination with beneficial microbial inoculants (AM fungus and PGPR) to  
657 improve drought stress tolerance in tomato. *Environ Exp Bot* 131:47–57.
- 658 20. Zhang H, Wei S, Hu W, Xiao L, Tang M. 2017. Arbuscular Mycorrhizal Fungus  
659 *Rhizophagus irregularis* Increased Potassium Content and Expression of Genes Encoding  
660 Potassium Channels in *Lycium barbarum*. *Front Plant Sci* 8:1–11.
- 661 21. Garg N, Singh S. 2018. Arbuscular Mycorrhiza *Rhizophagus irregularis* and Silicon  
662 Modulate Growth, Proline Biosynthesis and Yield in *Cajanus cajan* L. Millsp. (pigeonpea)  
663 Genotypes Under Cadmium and Zinc Stress. *J Plant Growth Regul* 37:46–63.
- 664 22. Begum N, Qin C, Ahanger MA, Raza S, Khan MI, Ashraf M, Ahmed N, Zhang L. 2019.  
665 Role of Arbuscular Mycorrhizal Fungi in Plant Growth Regulation: Implications in Abiotic  
666 Stress Tolerance. *Front Plant Sci* 10.
- 667 23. Smith SE, Smith FA, Jakobsen I. 2003. Mycorrhizal Fungi Can Dominate Phosphate  
668 Supply to Plants Irrespective of Growth Responses. *Plant Physiol* 133:16–20.
- 669 24. Govindarajulu M, Pfeffer PE, Jin H, Abubaker J, Douds DD, Allen JW, Bücking H,  
670 Lammers PJ, Shachar-Hill Y. 2005. Nitrogen transfer in the arbuscular mycorrhizal  
671 symbiosis. *Nature* 435:819–823.
- 672 25. Cruz C, Egsgaard H, Trujillo C, Ambus P, Requena N, Martins-Loução MA, Jakobsen I.  
673 2007. Enzymatic evidence for the key role of arginine in nitrogen translocation by  
674 arbuscular mycorrhizal fungi. *Plant Physiol* 144:782–792.
- 675 26. Fiorilli V, Lanfranco L, Bonfante P. 2013. The expression of GintPT, the phosphate  
676 transporter of *Rhizophagus irregularis*, depends on the symbiotic status and phosphate  
677 availability. *Planta* 237:1267–1277.
- 678 27. Ezawa T, Saito K. 2018. How do arbuscular mycorrhizal fungi handle phosphate? New  
679 insight into fine-tuning of phosphate metabolism. *New Phytol*. Blackwell Publishing Ltd.
- 680 28. Ho I, Trappe JM. 1973. Translocation of <sup>14</sup>C from *Festuca* Plants to their Endomycorrhizal  
681 Fungi. *Nat New Biol* 244:30–31.
- 682 29. Solaiman MZ, Saito M. 1997. Use of sugars by intraradical hyphae of arbuscular  
683 mycorrhizal fungi revealed by radiorespirometry. *New Phytol* 136:533–538.

- 684 30. Bago B, Pfeffer PE, Shachar-Hill Y. 2000. Carbon Metabolism and Transport in Arbuscular  
685 Mycorrhizas. *Plant Physiol* 124:949–958.
- 686 31. Ait Lahmidi N, Courty PE, Brulé D, Chatagnier O, Arnould C, Doidy J, Berta G, Lingua G,  
687 Wipf D, Bonneau L. 2016. Sugar exchanges in arbuscular mycorrhiza: RiMST5 and  
688 RiMST6, two novel *Rhizophagus irregularis* monosaccharide transporters, are involved in  
689 both sugar uptake from the soil and from the plant partner. *Plant Physiol Biochem*  
690 107:354–363.
- 691 32. Jiang Y, Wang W, Xie Q, Liu N, Liu L, Wang D, Zhang X, Yang C, Chen X, Tang D, Wang  
692 E. 2017. Plants transfer lipids to sustain colonization by mutualistic mycorrhizal and  
693 parasitic fungi. *Science* (80- ) 356:1172–1173.
- 694 33. Luginbuehl LH, Menard GN, Kurup S, Van Erp H, Radhakrishnan G V., Breakspear A,  
695 Oldroyd GED, Eastmond PJ. 2017. Fatty acids in arbuscular mycorrhizal fungi are  
696 synthesized by the host plant. *Science* (80- ) 356:1175–1178.
- 697 34. Henry CS, DeJongh M, Best AA, Frybarger PM, Linsay B, Stevens RL. 2010. High-  
698 throughput generation, optimization and analysis of genome-scale metabolic models. *Nat*  
699 *Biotechnol* 28:977–982.
- 700 35. Keymer A, Pimprikar P, Wewer V, Huber C, Brands M, Bucerius SL, Delaux PM, Klingl V,  
701 von Röpenack-Lahaye E, Wang TL, Eisenreich W, Dörmann P, Parniske M, Gutjahr C.  
702 2017. Lipid transfer from plants to arbuscular mycorrhiza fungi. *Elife* 6:1–33.
- 703 36. Koide RT, Kabir Z. 2000. Extraradical hyphae of the mycorrhizal fungus *Glomus*  
704 *intraradices* can hydrolyse organic phosphate. *New Phytol* 148:511–517.
- 705 37. Maldonado-Mendoza IE, Dewbre GR, Harrison MJ. 2001. A phosphate transporter gene  
706 from the extra-radical mycelium of an arbuscular mycorrhizal fungus *Glomus intraradices*  
707 is regulated in response to phosphate in the environment. *Mol Plant-Microbe Interact*  
708 14:1140–1148.
- 709 38. Walder F, Boller T, Wiemken A, Courty PE. 2016. Regulation of plants' phosphate uptake  
710 in common mycorrhizal networks: Role of intraradical fungal phosphate transporters. *Plant*  
711 *Signal Behav* 11:e1131372.
- 712 39. Courty PE, Smith P, Koegel S, Redecker D, Wipf D. 2015. Inorganic Nitrogen Uptake and  
713 Transport in Beneficial Plant Root-Microbe Interactions. *CRC Crit Rev Plant Sci* 34:4–16.
- 714 40. López-Pedrosa A, González-Guerrero M, Valderas A, Azcón-Aguilar C, Ferrol N. 2006.  
715 GintAMT1 encodes a functional high-affinity ammonium transporter that is expressed in  
716 the extraradical mycelium of *Glomus intraradices*. *Fungal Genet Biol* 43:102–110.
- 717 41. Pérez-Tienda J, Testillano PS, Balestrini R, Fiorilli V, Azcón-Aguilar C, Ferrol N. 2011.  
718 GintAMT2, a new member of the ammonium transporter family in the arbuscular  
719 mycorrhizal fungus *Glomus intraradices*. *Fungal Genet Biol* 48:1044–1055.
- 720 42. Calabrese S, Pérez-Tienda J, Ellerbeck M, Arnould C, Chatagnier O, Boller T, Schübler A,  
721 Brachmann A, Wipf D, Ferrol N, Courty P-E. 2016. GintAMT3 – a Low-Affinity Ammonium  
722 Transporter of the Arbuscular Mycorrhizal *Rhizophagus irregularis*. *Front Plant Sci* 7:679.
- 723 43. Tian C, Kasiborski B, Koul R, Lammers PJ, Bucking H, Shachar-Hill Y. 2010. Regulation  
724 of the nitrogen transfer pathway in the arbuscular mycorrhizal symbiosis: Gene  
725 characterization and the coordination of expression with nitrogen flux. *Plant Physiol*  
726 153:1175–1187.
- 727 44. Helber N, Wippel K, Sauer N, Schaarschmidt S, Hause B, Requena N. 2011. A versatile  
728 monosaccharide transporter that operates in the arbuscular mycorrhizal fungus *Glomus* sp  
729 is crucial for the symbiotic relationship with plants. *Plant Cell* 23:3812–3823.
- 730 45. Wewer V, Brands M, Dörmann P. 2014. Fatty acid synthesis and lipid metabolism in the  
731 obligate biotrophic fungus *Rhizophagus irregularis* during mycorrhization of *Lotus*  
732 *japonicus*. *Plant J* 79:398–412.
- 733 46. Roth R, Paszkowski U. 2017. Plant carbon nourishment of arbuscular mycorrhizal fungi.  
734 *Curr Opin Plant Biol*.
- 735 47. Sugiura Y, Akiyama R, Tanaka S, Yano K, Kameoka H, Marui S, Saito M, Kawaguchi M,  
736 Akiyama K, Saito K. 2020. Myristate can be used as a carbon and energy source for the  
737 asymbiotic growth of arbuscular mycorrhizal fungi. *Proc Natl Acad Sci* 117:202006948.

- 738 48. Abdellatif L, Lokuruge P, Hamel C. 2019. Axenic growth of the arbuscular mycorrhizal  
739 fungus *Rhizophagus irregularis* and growth stimulation by coculture with plant growth-  
740 promoting rhizobacteria. *Mycorrhiza* 29:591–598.
- 741 49. Tisserant E, Malbreil M, Kuo A, Kohler A, Symeonidi A, Balestrini R, Charron P, Duensing  
742 N, Frei dit Frey N, Gianinazzi-Pearson V, Gilbert LB, Handa Y, Herr JR, Hijri M, Koul R,  
743 Kawaguchi M, Krajinski F, Lammers PJ, Masclaux FG, Murat C, Morin E, Ndikumana S,  
744 Pagni M, Petitpierre D, Requena N, Rosikiewicz P, Riley R, Saito K, San Clemente H,  
745 Shapiro H, van Tuinen D, Becard G, Bonfante P, Paszkowski U, Shachar-Hill YY, Tuskan  
746 GA, Young JPW, Sanders IR, Henrissat B, Rensing SA, Grigoriev I V., Corradi N, Roux C,  
747 Martin F. 2013. Genome of an arbuscular mycorrhizal fungus provides insight into the  
748 oldest plant symbiosis. *Proc Natl Acad Sci* 110:20117–20122.
- 749 50. Lin K, Limpens E, Zhang Z, Ivanov S, Saunders DGO, Mu D, Pang E, Cao H, Cha H, Lin  
750 T, Zhou Q, Shang Y, Li Y, Sharma T, van Velzen R, de Ruijter N, Aanen DK, Win J,  
751 Kamoun S, Bisseling T, Geurts R, Huang S. 2014. Single Nucleus Genome Sequencing  
752 Reveals High Similarity among Nuclei of an Endomycorrhizal Fungus. *PLoS Genet* 10.  
753 51. Chen ECH, Morin E, Beaudet D, Noel J, Yildirim G, Ndikumana S, Charron P, St-Onge C,  
754 Giorgi J, Krüger M, Marton T, Ropars J, Grigoriev I V., Hainaut M, Henrissat B, Roux C,  
755 Martin F, Corradi N. 2018. High intraspecific genome diversity in the model arbuscular  
756 mycorrhizal symbiont *Rhizophagus irregularis*. *New Phytol* 220:1161–1171.
- 757 52. Morin E, Miyauchi S, San Clemente H, Chen ECH, Pelin A, Providencia I, Ndikumana S,  
758 Beaudet D, Hainaut M, Drula E, Kuo A, Tang N, Roy S, Viala J, Henrissat B, Grigoriev I  
759 V., Corradi N, Roux C, Martin FM. 2019. Comparative genomics of *Rhizophagus*  
760 *irregularis*, *R. cerebriforme*, *R. diaphanus* and *Gigaspora rosea* highlights specific genetic  
761 features in Glomeromycotina. *New Phytol* 222:1584–1598.
- 762 53. Tamayo E, Gómez-Gallego T, Azcón-Aguilar C, Ferrol N. 2014. Genome-wide analysis of  
763 copper, iron and zinc transporters in the arbuscular mycorrhizal fungus *Rhizophagus*  
764 *irregularis*. *Front Plant Sci* 5:1–13.
- 765 54. Handa Y, Nishide H, Takeda N, Suzuki Y, Kawaguchi M, Saito K. 2015. RNA-seq  
766 Transcriptional Profiling of an Arbuscular Mycorrhiza Provides Insights into Regulated and  
767 Coordinated Gene Expression in *Lotus japonicus* and *Rhizophagus irregularis*. *Plant Cell*  
768 *Physiol* 56:1490–1511.
- 769 55. Calabrese S, Kohler A, Niehl A, Veneault-Fourrey C, Boller T, Courty PE. 2017.  
770 Transcriptome analysis of the *Populus trichocarpa-Rhizophagus irregularis* mycorrhizal  
771 symbiosis: Regulation of plant and fungal transportomes under nitrogen starvation. *Plant*  
772 *Cell Physiol* 58:1003–1017.
- 773 56. Calabrese S, Cusant L, Sarazin A, Niehl A, Erban A, Brulé D, Recorbet G, Wipf D, Roux  
774 C, Kopka J, Boller T, Courty PE. 2019. Imbalanced Regulation of Fungal Nutrient  
775 Transports According to Phosphate Availability in a Symbiosome Formed by Poplar,  
776 Sorghum, and *Rhizophagus irregularis*. *Front Plant Sci* 10:1617.
- 777 57. Fang X, Lloyd CJ, Palsson BO. 2020. Reconstructing organisms in silico: genome-scale  
778 models and their emerging applications. *Nat Rev Microbiol* 18:1–13.
- 779 58. Pfau T, Christian N, Masakapalli SK, Swee LJ, Poolman MG, Ebenhöf O. 2018. The  
780 intertwined metabolism during symbiotic nitrogen fixation elucidated by metabolic  
781 modelling. *Nature* 8:1–11.
- 782 59. diCenzo GC, Tesi M, Pfau T, Mengoni A, Fondi M. 2020. Genome-scale metabolic  
783 reconstruction of the symbiosis between a leguminous plant and a nitrogen-fixing  
784 bacterium. *Nat Commun* 11.
- 785 60. Hildebrandt U, Ouziad F, Marnier F-J, Bothe H. 2006. The bacterium *Paenibacillus validus*  
786 stimulates growth of the arbuscular mycorrhizal fungus *Glomus intraradices* up to the  
787 formation of fertile spores. *FEMS Microbiol Lett* 254:258–267.
- 788 61. Bordbar A, Monk JM, King ZA, Palsson BO. 2014. Constraint-based models predict  
789 metabolic and associated cellular functions. *Nat Rev Genet*. Nature Publishing Group.
- 790 62. Harcombe WR, Riehl WJ, Dukovski I, Granger BR, Betts A, Lang AH, Bonilla G, Kar A,  
791 Leiby N, Mehta P, Marx CJ, Segre D. 2014. Metabolic Resource Allocation in Individual

- 792 Microbes Determines Ecosystem Interactions and Spatial Dynamics. *Cell Rep* 7:1104–  
793 1115.
- 794 63. Arkin AP, Cottingham RW, Henry CS, Harris NL, Stevens RL, Maslov S, Dehal P, Ware D,  
795 Perez F, Canon S, Sneddon MW, Henderson ML, Riehl WJ, Murphy-Olson D, Chan SY,  
796 Kamimura RT, Kumari S, Drake MM, Brettin TS, Glass EM, Chivian D, Gunter D, Weston  
797 DJ, Allen BH, Baumohl J, Best AA, Bowen B, Brenner SE, Bun CC, Chandonia JM, Chia  
798 JM, Colasanti R, Conrad N, Davis JJ, Davison BH, DeJongh M, Devoid S, Dietrich E,  
799 Dubchak I, Edirisinghe JN, Fang G, Faria JP, Frybarger PM, Gerlach W, Gerstein M,  
800 Greiner A, Gurtowski J, Haun HL, He F, Jain R, Joachimiak MP, Keegan KP, Kondo S,  
801 Kumar V, Land ML, Meyer F, Mills M, Novichkov PS, Oh T, Olsen GJ, Olson R, Parrello B,  
802 Pasternak S, Pearson E, Poon SS, Price GA, Ramakrishnan S, Ranjan P, Ronald PC,  
803 Schatz MC, Seaver SMDD, Shukla M, Sutormin RA, Syed MH, Thomason J, Tintle NL,  
804 Wang D, Xia F, Yoo H, Yoo S, Yu D. 2018. KBase: The United States Department of  
805 Energy Systems Biology Knowledgebase. *Nat Biotechnol* 36:566–569.
- 806 64. Mo ML, Palsson B, Herrgård MJ. 2009. Connecting extracellular metabolomic  
807 measurements to intracellular flux states in yeast. *BMC Syst Biol* 3.
- 808 65. Rosikiewicz P, Bonvin J, Sanders IR. 2017. Cost-efficient production of in vitro  
809 *Rhizophagus irregularis*. *Mycorrhiza* 27:477–486.
- 810 66. Vijayakumar V, Liebisch G, Buer B, Xue L, Gerlach N, Blau S, Schmitz J, Bucher M. 2016.  
811 Integrated multi-omics analysis supports role of lysophosphatidylcholine and related  
812 glycerophospholipids in the *Lotus japonicus*-*Glomus intraradices* mycorrhizal symbiosis.  
813 *Plant Cell Environ* 39:393–415.
- 814 67. Olsson PA, Johansen A. 2000. Lipid and fatty acid composition of hyphae and spores of  
815 arbuscular mycorrhizal fungi at different growth stages. *Mycol Res* 104:429–434.
- 816 68. Sánchez BJ, Zhang C, Nilsson A, Lahtvee P, Kerkhoven EJ, Nielsen J. 2017. Improving  
817 the phenotype predictions of a yeast genome-scale metabolic model by incorporating  
818 enzymatic constraints. *Mol Syst Biol* 13:935.
- 819 69. Pons S, Fournier S, Chervin C, Bécard G, Rochange S, Dit Frey NF, Pagès VP. 2020.  
820 Phytohormone production by the arbuscular mycorrhizal fungus *Rhizophagus irregularis*.  
821 *PLoS One* 15.
- 822 70. Maillet F, Poinsot V, André O, Puech-Pagès V, Haouy A, Gueunier M, Cromer L, Giraudet  
823 D, Formey D, Niebel A, Martinez EA, Driguez H, Bécard G, Dénarié J. 2011. Fungal  
824 lipochitooligosaccharide symbiotic signals in arbuscular mycorrhiza. *Nature* 469:58–64.
- 825 71. Genre A, Chabaud M, Balzergue C, Puech-Pagès V, Novero M, Rey T, Fournier J,  
826 Rochange S, Bécard G, Bonfante P, Barker DG. 2013. Short-chain chitin oligomers from  
827 arbuscular mycorrhizal fungi trigger nuclear  $Ca^{2+}$  spiking in *Medicago truncatula* roots and  
828 their production is enhanced by strigolactone. *New Phytol* 198:190–202.
- 829 72. Callow JA, Capaccio LCM, Parish G, Tinker PB. 1978. Detection and Estimation of  
830 Polyphosphate in Vesicular-Arbuscular Mycorrhizas. *New Phytol* 80:125–134.
- 831 73. Ezawa T, Smith SE, Smith FA. 2002. P metabolism and transport in AM fungi, p. 221–230.  
832 *In Plant and Soil*. Springer.
- 833 74. Kanehisa M, Goto S. 2000. KEGG: kyoto encyclopedia of genes and genomes. *Nucleic  
834 Acids Res* 28:27–30.
- 835 75. Hastings J, Owen G, Dekker A, Ennis M, Kale N, Muthukrishnan V, Turner S, Swainston  
836 N, Mendes P, Steinbeck C. 2016. ChEBI in 2016: Improved services and an expanding  
837 collection of metabolites. *Nucleic Acids Res* 44:D1214–D1219.
- 838 76. Lieven C, Beber ME, Olivier BG, Bergmann FT, Ataman M, Babaei P, Bartell JA, Blank  
839 LM, Chauhan S, Correia K, Diener C, Dramp A, Ebert BE, Edirisinghe JN, Faria P, Feist  
840 AM, Fengos G, T Fleming RM, Garcamp B, Hatzimanikatis V, Helvoirt W, Henry CS,  
841 Hermjakob H, Herrgamp MJ, Kaafarani A, Uk Kim H, King Z, Klamt S, Klipp E, Koehorst  
842 JJ, Kamp M, Lakshmanan M, Lee D-Y, Yup Lee S, Lee S, Lewis NE, Liu F, Ma H,  
843 Machado D, Mahadevan R, Maia P, Mardinoglu A, Medlock GL, Monk JM, Nielsen J, Keld  
844 Nielsen L, Nogales J, Nookaew I, Palsson BO, Papin JA, Patil KR, Poolman M, Price ND,  
845 Resendis-Antonio O, Richelle A, Rocha I, Samp J, Schaap PJ, Malik Sherif RS, Shoaie S,



- 846 Sonnenschein N, Teusink B, Vilaamp P, Olav Vik J, H Wodke JA, Xavier JC, Yuan Q,  
847 Zakhartsev M, Zhang C. 2020. MEMOTE for standardized genome-scale metabolic model  
848 testing. *Nat Biotechnol* 38:272–276.
- 849 77. Lu H, Li F, Sánchez BJ, Zhu Z, Li G, Domenzain I, Marcišauskas S, Anton PM, Lappa D,  
850 Lieven C, Beber ME, Sonnenschein N, Kerkhoven EJ, Nielsen J. 2019. A consensus *S.*  
851 *cerevisiae* metabolic model Yeast8 and its ecosystem for comprehensively probing  
852 cellular metabolism. *Nat Commun* 10:3586.
- 853 78. Orth JD, Thiele I, Palsson BO. 2010. What is flux balance analysis? *Nat Biotechnol*  
854 28:245–248.
- 855 79. Savinell JM, Palsson BO. 1992. Optimal selection of metabolic fluxes for in vivo  
856 measurement. I. Development of mathematical methods. *J Theor Biol* 155:201–214.
- 857 80. Mahadevan R, Schilling CH. 2003. The effects of alternate optimal solutions in constraint-  
858 based genome-scale metabolic models. *Metab Eng* 5:264–276.
- 859 81. Bécard G, Fortin JA. 1988. Early events of vesicular–arbuscular mycorrhiza formation on  
860 Ri T-DNA transformed roots. *New Phytol* 108:211–218.
- 861 82. Kameoka H, Tsutsui I, Saito K, Kikuchi Y, Handa Y, Ezawa T, Hayashi H, Kawaguchi M,  
862 Akiyama K. 2019. Stimulation of asymbiotic sporulation in arbuscular mycorrhizal fungi by  
863 fatty acids. *Nat Microbiol*. Nature Publishing Group.
- 864 83. Pfeffer PE, Douds DD, Bécard G, Shachar-Hill Y. 1999. Carbon Uptake and the  
865 Metabolism and Transport of Lipids in an Arbuscular Mycorrhiza. *Plant Physiol* 120:587–  
866 598.
- 867 84. Adadi R, Volkmer B, Milo R, Heinemann M, Shlomi T. 2012. Prediction of microbial growth  
868 rate versus biomass yield by a metabolic network with kinetic parameters. *PLoS Comput*  
869 *Biol* 8:e1002575.
- 870 85. Bekiaris PS, Klamt S. 2020. Automatic construction of metabolic models with enzyme  
871 constraints. *BMC Bioinformatics* 21:19.
- 872 86. Nilsson A, Nielsen J, Palsson BO. 2017. Metabolic Models of Protein Allocation Call for  
873 the Kinetome. *Cell Syst* 5:538–541.
- 874 87. Beg QK, Vazquez A, Ernst J, De Menezes MA, Bar-Joseph Z, Barabási AL, Oltvai ZN.  
875 2007. Intracellular crowding defines the mode and sequence of substrate uptake by  
876 *Escherichia coli* and constrains its metabolic activity. *PNAS* 104:12663–12668.
- 877 88. Goelzer A, Fromion V, Scorletti G. 2011. Cell design in bacteria as a convex optimization  
878 problem. *Automatica* 47:1210–1218.
- 879 89. Li JCH. 2016. Effect size measures in a two-independent-samples case with nonnormal  
880 and nonhomogeneous data. *Behav Res Methods* 48:1560–1574.
- 881 90. Perez-Garcia O, Lear G, Singhal N. 2016. Metabolic Network Modeling of Microbial  
882 Interactions in Natural and Engineered Environmental Systems. *Front Microbiol* 7:673.
- 883 91. MATLAB. 2017. version 9.3.0 (R2017b). The MathWorks Inc., Natick, Massachusetts.
- 884 92. Heirendt L, Arreckx S, Pfau T, Mendoza SN, Richelle A, Heinken A, Haraldsdóttir HS,  
885 Wachowiak J, Keating SM, Vlasov V, Magnusdóttir S, Ng CY, Preciat G, Žagare A, Chan  
886 SHJ, Aurich MK, Clancy CM, Modamio J, Sauls JT, Noronha A, Bordbar A, Cousins B, El  
887 Assal DC, Valcarcel L V., Apaolaza I, Ghaderi S, Ahookhosh M, Ben Guebila M,  
888 Kostromins A, Sompairac N, Le HM, Ma D, Sun Y, Wang L, Yurkovich JT, Oliveira MAP,  
889 Vuong PT, El Assal LP, Kuperstein I, Zinovyev A, Hinton HS, Bryant WA, Aragón Artacho  
890 FJ, Planes FJ, Stalidzans E, Maass A, Vempala S, Hucka M, Saunders MA, Maranas CD,  
891 Lewis NE, Sauter T, Palsson BØ, Thiele I, Fleming RMT. 2019. Creation and analysis of  
892 biochemical constraint-based models using the COBRA Toolbox v.3.0. *Nat Protoc*  
893 14:639–702.
- 894 93. King ZA, Lu J, Dräger A, Miller P, Federowicz S, Lerman JA, Ebrahim A, Palsson BO,  
895 Lewis NE. 2016. BiGG Models: A platform for integrating, standardizing and sharing  
896 genome-scale models. *Nucleic Acids Res* 44:D515–D522.
- 897 94. Caspi R, Billington R, Keseler IM, Kothari A, Krummenacker M, Midford PE, Ong WK,  
898 Paley S, Subhraveti P, Karp PD. 2020. The MetaCyc database of metabolic pathways and  
899 enzymes—a 2019 update. *Nucleic Acids Res* 48:D455–D453.

- 900 95. Moretti S, Martin O, Van Du Tran T, Bridge A, Morgat A, Pagni M. 2016.  
901 MetaNetX/MNXref - Reconciliation of metabolites and biochemical reactions to bring  
902 together genome-scale metabolic networks. *Nucleic Acids Res* 44:D523–D526.
- 903 96. Kim S, Chen J, Cheng T, Gindulyte A, He J, He S, Li Q, Shoemaker BA, Thiessen PA, Yu  
904 B, Zaslavsky L, Zhang J, Bolton EE. 2019. PubChem 2019 update: Improved access to  
905 chemical data. *Nucleic Acids Res* 47:D1102–D1109.
- 906 97. Jolicoeur M, Germette S, Gaudette M, Perrier M, Bécard G. 1998. Intracellular pH in  
907 Arbuscular Mycorrhizal Fungi: A Symbiotic Physiological Marker. *Plant Physiol* 116:1279–  
908 1288.
- 909 98. Belmondo S, Fiorilli V, Pérez-Tienda J, Ferrol N, Marmeisse R, Lanfranco L. 2014. A  
910 dipeptide transporter from the arbuscular mycorrhizal fungus *Rhizophagus irregularis* is  
911 upregulated in the intraradical phase. *Front Plant Sci* 5:436.
- 912 99. Chan SHJ, Cai J, Wang L, Simons-Senftle MN, Maranas CD. 2017. Standardizing  
913 biomass reactions and ensuring complete mass balance in genome-scale metabolic  
914 models. *Bioinformatics* 33:3603–3609.
- 915 100. Sánchez BJ, Li F, Kerkhoven EJ, Nielsen J. 2019. SLIMeR: Probing flexibility of lipid  
916 metabolism in yeast with an improved constraint-based modeling framework. *BMC Syst*  
917 *Biol* 13:1–9.
- 918 101. Maranas CD, Zomorodi AR. 2016. Thermodynamic Analysis of Metabolic Networks, p.  
919 107–117. *In* Optimization Methods in Metabolic Networks. John Wiley & Sons, Ltd.
- 920 102. Bolger AM, Lohse M, Usadel B. 2014. Trimmomatic: a flexible trimmer for Illumina  
921 sequence data. *Bioinformatics* 30:2114–2120.
- 922 103. Dobin A, Davis CA, Schlesinger F, Drenkow J, Zaleski C, Jha S, Batut P, Chaisson M,  
923 Gingeras TR. 2013. STAR: ultrafast universal RNA-seq aligner. *Bioinformatics* 29:15–21.
- 924 104. Anders S, Pyl PT, Huber W. 2015. HTSeq—a Python framework to work with high-  
925 throughput sequencing data. *Bioinformatics* 31:166–169.
- 926 105. Altschul SF, Gish W, Miller W, Myers EW, Lipman DJ. 1990. Basic local alignment search  
927 tool. *J Mol Biol* 215:403–410.
- 928 106. Camacho C, Coulouris G, Avagyan V, Ma N, Papadopoulos J, Bealer K, Madden TL.  
929 2009. BLAST+: architecture and applications. *BMC Bioinformatics* 10:421.
- 930 107. Placzek S, Schomburg I, Chang A, Jeske L, Ulbrich M, Tillack J, Schomburg D. 2017.  
931 BRENDA in 2017: new perspectives and new tools in BRENDA. *Nucleic Acids Res*  
932 45:D380–D388.
- 933 108. Wittig U, Rey M, Weidemann A, Kania R, Müller W. 2018. SABIO-RK: An updated  
934 resource for manually curated biochemical reaction kinetics. *Nucleic Acids Res* 46:D656–  
935 D660.
- 936 109. The UniProt Consortium. 2017. UniProt: the universal protein knowledgebase. *Nucleic*  
937 *Acids Res* 45:D158–D169.
- 938 110. Meijer MMC, Boonstra J, Verkleij AJ, Theo Verrips C. 1996. Kinetic analysis of hexose  
939 uptake in *Saccharomyces cerevisiae* cultivated in continuous culture. *Biochim Biophys*  
940 *Acta - Bioenerg* 1277:209–216.
- 941 111. Reifenberger E, Boles E, Ciriacy M. 1997. Kinetic Characterization of Individual Hexose  
942 Transporters of *Saccharomyces cerevisiae* and their Relation to the Triggering  
943 Mechanisms of Glucose Repression. *Eur J Biochem* 245:324–333.
- 944  
945  
946

947 **Figures and Tables**  
948

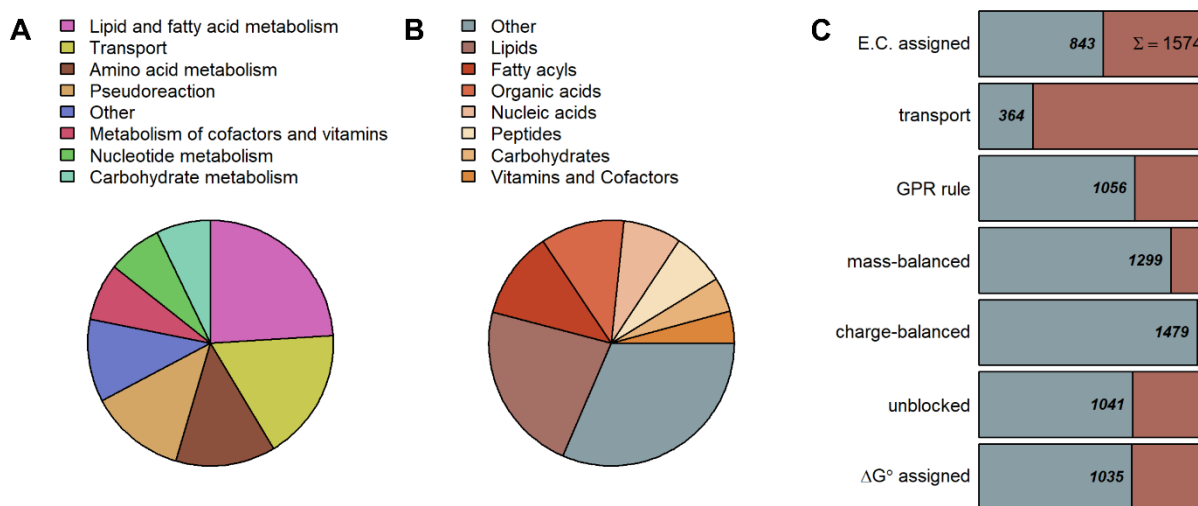

949  
950 **Figure 1. Properties of the *R. irregularis* genome-scale metabolic model iRi1574.** (A) The  
951 iRi1574 includes 13 metabolic subsystems, primarily defined by KEGG pathways with manual  
952 refinement. The pie chart illustrates the percentage of reactions participating in these metabolic  
953 subsystems. (B) metabolite classification using KEGG BRITE with manual refinement with help of  
954 the ChEBI ontology. (C) binary classification of reactions based on eight criteria, including:  
955 assignment of Enzyme Classification (E.C.) number, involvement in transport, association to genes  
956 via GPR rules, mass- and charge-balancing, available value for standard Gibbs free energy and  
957 catalytic constants of associated proteins, and ability to support steady-state flux.  
958  
959

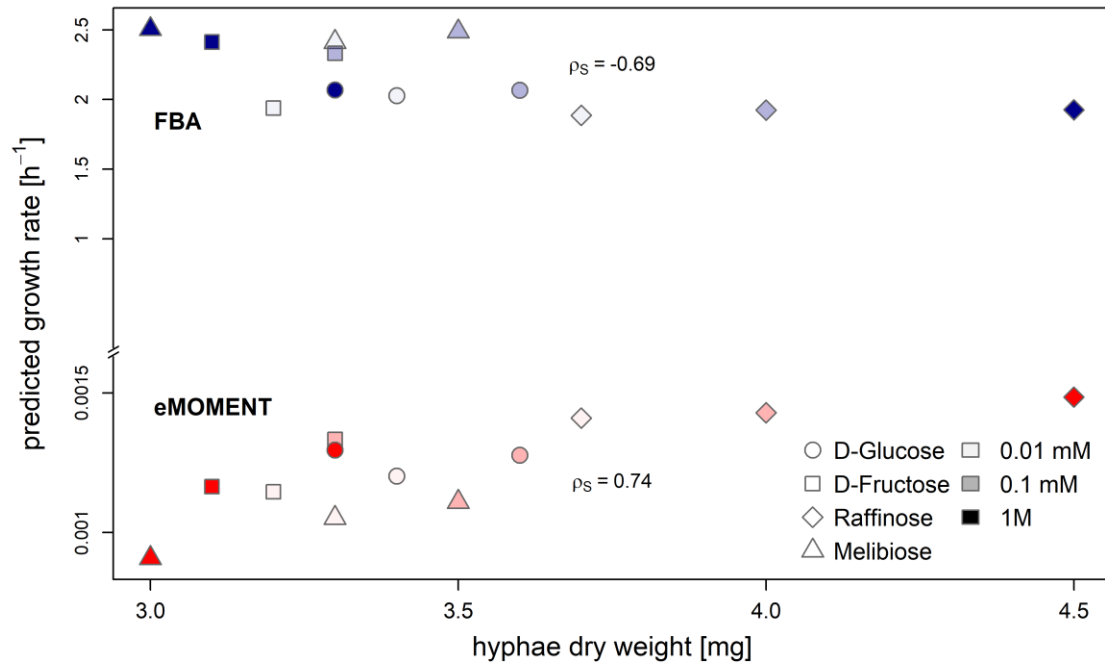

960  
961 **Figure 2. Prediction of growth for iRi1574 using eMOMENT and FBA.** Scatter plot of growth  
962 rates predicted by eMOMENT (red) compared with FBA without constraints on enzyme  
963 abundances (blue). The predicted growth rates were compared with experimental data obtained  
964 for *Glomus intraradices* Sy167 (60), which is the phylogenetically closest species with this kind of  
965 data available. The concordance of predicted growth rates and experimentally measured hyphae  
966 dry weight was quantified by the Spearman correlation  $\rho_s$ .  
967

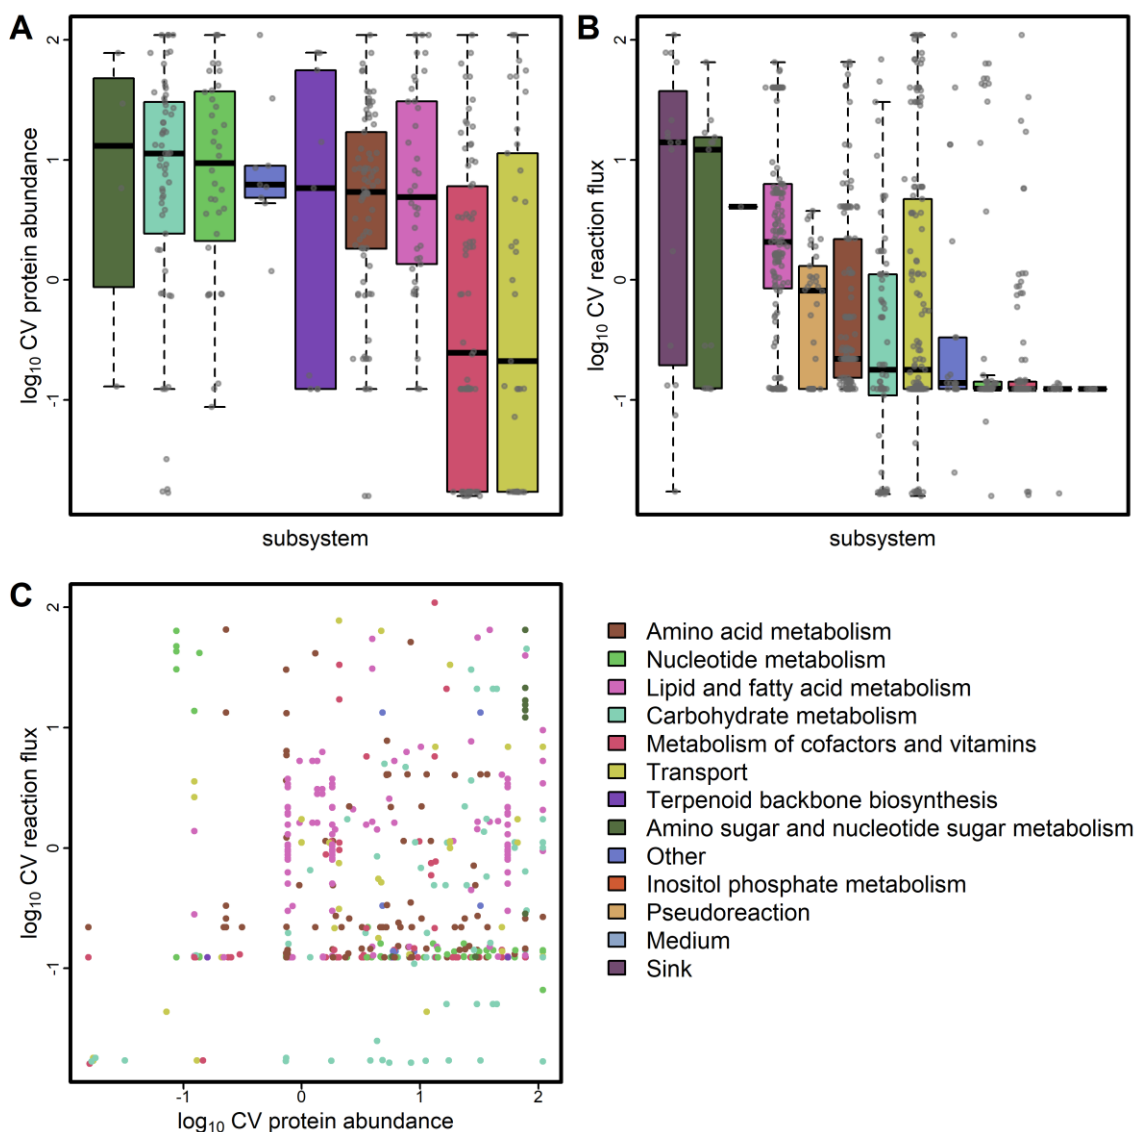

968  
969 **Figure 3. Plasticity of protein abundance and reaction fluxes across 12 simulated media**  
970 **conditions.** The coefficient of variation (CV) was calculated across all media conditions (i.e.  
971 glucose, fructose, raffinose, and melibiose at 10, 100, and 1000 mM each) for protein abundances  
972 (A) and reaction fluxes (B). The boxes are ordered by median of the  $\log_{10}$ -transformed data. (C)  
973 The CV of fluxes is plotted against the CV of abundance of their associated proteins.  
974

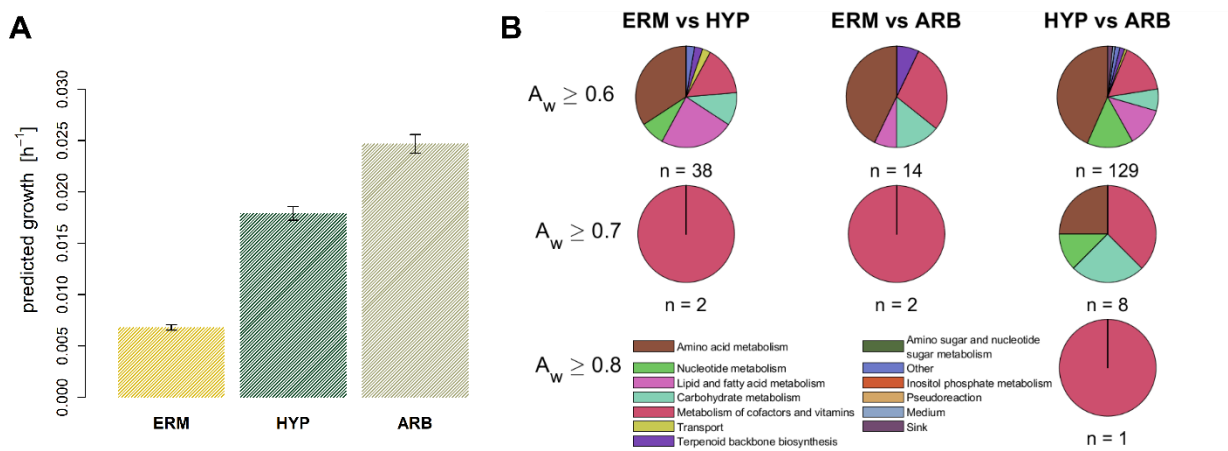

975 **Figure 4. Growth simulation of *R. irregularis* for three fungal structures.** The upper limit for  
 976 reaction flux was calculated as  $k_{cat} \cdot [E]$ . Values for turnover constants associated to reaction was  
 977 done similarly as in GECKO (68). Structure-specific expression data were used as proxy for protein  
 978 concentrations. This was done by multiplying relative transcript abundances with the maximum total  
 979 protein content measured with the available carbon source ( $C = 0.106 \text{ g } gDW^{-1}$ ) (60) (see  
 980 Methods section for more detail). **(A)** predicted growth for the three fungal structures. The error  
 981 bars represent predicted growth rates at  $C \pm \sigma$ , where  $\sigma$  represents the standard deviation  
 982 determined for the experimentally measured protein content. **(B)** Distribution of subsystems for  
 983 reactions that show non-parametric common language effect sizes ( $A_w$ ) above selected thresholds  
 984 for each pairwise comparison of flux distributions between the three fungal structures. The total  
 985 numbers of reactions with  $A_w$  greater than the threshold are shown below each of the pie charts.  
 986 No chart is shown if no reaction was found to have an  $A_w$  above the threshold.  
 987

988 **Supplementary Information Legends**

989

990 **Supplementary File S1:** iRi1574 model in Systems Biology Markup Language (SBML) format.

991 **Supplementary File S2:** Quality assessment report from the MEMOTE test suite (76).

992 **Supplementary Table S1:** iRi1574 model in Excel format.

993 **Supplementary Table S2:** Characteristics of published fungal models selected for comparison  
994 with iRi1574.

995 **Supplementary Table S3:** FBA solution and feasible ranges and of all reactions in the iRi1574  
996 model determined by FVA.

997 **Supplementary Table S4:** eMOMENT solution and feasible ranges and of all reactions in the  
998 enzyme-constraint iRi1574 model.

999 **Supplementary Table S5:** Experimentally measured hyphal dry weight and protein content as  
1000 well as growth predictions by FBA and eMOMENT with different saccharides and their  
1001 concentrations (60).

1002 **Supplementary Table S6:** Coefficients of variation (CV) of abundances for each protein across  
1003 all simulated conditions (carbon source x concentration).

1004 **Supplementary Table S7:** Coefficients of variation (CV) of fluxes for each reaction across all  
1005 simulated conditions (carbon source x concentration).

1006 **Supplementary Table S8:** Non-parametric common language effect sizes between fluxes at  
1007 different developmental stages.

1008 **Supplementary Table S9:** Transport reactions in the iRi1574 model that were introduced from  
1009 the iMM904 model and retained without literature evidence.

1010 **Supplementary Table S10:** Biomass composition of the iRi1574 model.

1011 **Supplementary Table S11:** Flux limits for the (non-)growth associated ATP maintenance  
1012 reactions (NGAM, GAM) from fungal models.

1013 **Supplementary Table S12:** Minimal medium used for simulations.

1014 **Supplementary Table S13:** Calculation of hexose influxes for each of the carbon sources that  
1015 were used in the 12 simulated scenarios.

1016 **Supplementary Table S14:** Influence of reported SBC reactions on predicted growth.
